# Supplementary material for: Optimization of Carbon Ion Treatment Plans by Integrating Tissue Specific α/β-Values for Patients with Non-Resectable Pancreatic Cancer
Source: PLoS One. 2016 Oct 13;11(10):e0164473. doi: 10.1371/journal.pone.0164473 (PMC5063341; doi:10.1371/journal.pone.0164473)
Supplement: S1 Table — (XLSX) [file pone.0164473.s001.xlsx]

## Sheet: DVH per Case
		Target	Target	Target	Target	Spinal cord	Kidney right	Kidney right	Kidney right	Kidney left	Kidney left	Kidney left	Liver	Liver	Liver	Stomach/DD	Stomach/DD	Large intestine	Large intestine	Skin
Case	FS	V44≥90%	1-V42.75<1%	V50<1%	Min>40.0 Gy(RBE)	Max<24 Gy(RBE)	V15<15%	D25<10 Gy(RBE)	Mean<12 Gy(RBE)	V15<15%	D25<10 Gy(RBE)	Mean<12 Gy(RBE)	V20<12.5%	V10<20%	Mean<10 Gy(RBE)	V20<15%	Max<20 Gy(RBE)	Max<20 Gy(RBE)	V35<10%	Max<50%
1	1	98.55	0.06	0.51	40.579	50.538	3.08	0	1.225	1.25	0	0.509	0	0	0.08	0	3.565	60.18	3.27	80
	2	98.03	0.07	0.53	39.267	42.842	57.43	20.7	13.29	24.9	14.95	7.363	0	0	0.104	0	1.783	60.598	3.47	60
	3	98.66	0.05	0.36	40.754	37.168	13.68	4.4	4.159	0.29	0.01	0.308	2.22	7.81	1.62	0	2.556	58.706	3.53	60
	4	92.68	1.02	0.08	38.79	31.457	1.08	0.11	0.643	0.13	0.27	0.41	4.75	6.8	1.575	0	2.137	58.279	3.41	40
	5	89.63	1.87	0.35	34.393	31.351	2.96	0.16	1.296	0	0.15	0.129	4.93	7.68	1.675	0	2.029	59.708	3.61	40
2	1	99.03	0.05	1.3	41.705	46.671	14.3	2.77	5.616	0	0	0	0	0.14	0.059	0	1.262	59.863	5.69	80
	2	79.73	9.57	0.22	30.977	35.996	10.7	1.93	3.445	4.18	0.02	1.565	0	0.17	0.088	0	0.702	62.809	4.36	60
	3	84.63	6.94	0.1	34.53	35.306	12.46	4.18	3.856	2.61	0.01	1.098	0.24	0.79	0.228	0	2.651	62.504	4.38	60
	4	90.53	1.29	0.23	37.687	29.796	4.08	0.16	1.553	0	0.12	0.102	0.07	0.55	0.185	0	2.849	58.797	5.2	40
	5	76.03	11.92	0.03	33.738	29.835	3.2	0.11	1.257	0	0.12	0.087	0.03	0.44	0.136	0	0.928	60.083	4.63	40
3	1	97.95	0.27	0.83	37.642	47.287	0.05	0	0.189	7.05	0.46	2.698	0.43	5.88	1.302	9.33	73.021	60.991	3.67	80
	2	87.18	3.86	0.71	33.061	40.438	0.78	0	0.578	11.58	6.28	4.548	0.62	5.08	1.275	9.32	72.686	60.624	3.13	95
	3	92.83	1.73	0.47	36.371	29.04	41.98	20.94	10.978	66.58	21.09	16.258	13.82	20.83	5.256	9.98	70.48	59.042	3.14	50
	4	86.98	3.68	0.29	36.299	28.926	3.87	0.24	1.445	20.79	10.71	6.43	8.46	17.07	4.098	13.18	68.749	58.761	3.2	40
	5	87.73	4.37	0.36	36.603	29.648	3.36	0.1	1.283	10.23	2.8	3.616	8.59	20.88	4.434	10.56	69.385	58.674	3.08	40
4	1	95.36	0.51	0.88	37.03	49.336	4.87	0.14	1.993	0	0	0.001	0	0	0.002	0	1.434	60.786	3.58	8
	2	85.63	5.57	0.61	31.612	33.865	3.01	0.03	1.376	12.55	2.77	4.053	0	0	0.003	0	1.434	62.695	2.89	60
	3	81.18	6.57	0.18	33.134	35.024	42.24	18.41	11.089	17.08	8.68	5.408	2.82	6.37	1.361	0	1.015	61.139	3.08	60
	4	78.58	10.92	0.12	30.86	30.531	1.62	0.39	1.194	0	0.16	0.118	1.61	3.9	0.884	0	0.734	59.033	3.17	40
	5	76.83	11.29	0.13	32.176	30.995	1.54	0.2	1.092	0	0.17	0.136	0.94	4	0.83	0	0.877	58.575	3.22	40
5	1	97.23	0.07	0.65	39.542	51.513	8.49	0.01	3.401	0.25	0	0.17	1.05	2.97	0.974	14.58	73.107	61.657	0.69	80
	2	91.73	1.2	0.43	29.296	41.116	14.9	2.56	4.517	17.53	4.7	5.36	1.01	2.93	1.073	12.88	74.544	58.995	0.64	80
	3	91.78	1.92	0.15	32.228	35.561	16.26	5.52	4.885	33.28	21.45	8.778	13	21.78	5.454	10.51	70.587	58.168	0.66	50
	4	78.83	10.47	0.13	27.178	32.142	2.43	0.1	0.996	0.66	0.21	0.581	9.7	19.37	4.543	10.63	68.428	58.64	0.61	50
	5	86.93	3.58	0.27	33.726	32.538	2.5	0.06	1.028	0.82	0.23	0.591	9.71	20.83	4.613	15.13	68259	58.253	0.67	50
	Median	89.63	1.92	0.35	34.53	35.024	3.87	0.16	1.445	1.25	0.21	0.591	1.01	4	1.073	0	2.651	59.708	3.22	50
	Mean	88.97	3.954	0.3968	35.1671	36.7568	10.8348	3.3288	3.29536	9.2704	3.8144	2.81268	3.36	7.0508	1.67408	4.644	2757.04	59.9024	3.0792	55.32
	Max	99.03	11.92	1.3	41.705	51.513	57.43	20.94	13.29	66.58	21.45	16.258	13.82	21.78	5.454	15.13	68259	62.809	5.69	95
	Min	76.03	0.05	0.03	27.178	28.926	0.05	0	0.189	0	0	0	0	0	0.002	0	0.702	58.168	0.61	8
