# Supplementary material for: Optimization of Carbon Ion Treatment Plans by Integrating Tissue Specific α/β-Values for Patients with Non-Resectable Pancreatic Cancer
Source: PLoS One. 2016 Oct 13;11(10):e0164473. doi: 10.1371/journal.pone.0164473 (PMC5063341; doi:10.1371/journal.pone.0164473)
Supplement: S2 Table — (XLSX) [file pone.0164473.s002.xlsx]

## Sheet: Index
Structure		Target	Target	Target	Target	Spinal cord	Kidney right	Kidney right	Kidney right	Kidney left	Kidney left	Kidney left	Liver	Liver	Liver	Stomach/DD	Stomach/DD	Large intestine	Large intestine	Skin
Constraints		V44 ≥ 90%	1-V42.75 < 1%	V50<1%	Min>40.0 Gy(RBE)	Max<24 Gy(RBE)	V15<15%	D25<10 Gy	Mean<12Gy(RBE)	V15<15%	D25<10 Gy(RBE)	Mean<12Gy(RBE)	V20<12.5%	V10<20%	Mean<10 Gy(RBE)	V20<15%	Max<20 Gy(RBE)	Max<20 Gy(RBE)	V35<10%	Max<50%
Points		(10-0)	(10-0)	(10-0)	(10-0)	(15-0)	(5-0)	(5-0)	(5-0)	(5-0)	(5-0)	(5-0)	(5-0)	(5-0)	(5-0)	(5-0)	(5-0)	(5-0)	(5-0)	(5-0)
Case	FS
1	1	8	8	4	8	-15	3	5	3	2	5	2	5	5	5	5	1	-4	5	-2
	2	6	6	2	-2	-12	-1	-2	-1	-1	-1	1	5	5	4	5	5	-5	3	-1
	3	10	10	6	10	-9	2	2	2	3	4	4	4	1	2	5	2	-2	2	-1
	4	4	4	10	-4	-6	5	4	5	4	2	3	3	3	3	5	3	-1	4	5
	5	-2	2	8	-6	-3	4	3	4	5	3	5	2	2	1	5	4	-3	1	5
2	1	10	10	-2	10	-15	1	2	1	5	5	5	5	5	5	5	3	-2	1	-2
	2	-4	-4	6	-8	-12	3	3	3	3	3	1	5	4	4	5	5	-5	5	-1
	3	-2	-2	8	-4	-9	2	1	2	4	4	2	1	1	1	5	2	-4	4	-1
	4	8	8	4	-2	-3	4	4	4	5	2	3	2	2	2	5	1	-1	2	5
	5	-6	-6	10	-6	-6	5	5	5	5	2	4	3	3	3	5	4	-3	3	5
3	1	10	10	2	-2	-15	5	5	5	5	5	5	5	4	4	4	-5	-5	1	-2
	2	-4	4	4	-10	-12	4	5	4	3	3	3	5	5	5	5	-4	-4	4	-3
	3	8	8	6	-6	-6	-1	-1	1	-2	-1	-1	-1	-1	1	3	-3	-3	3	-1
	4	-6	6	10	-8	-3	2	3	2	-1	2	2	3	3	3	1	-1	-2	2	5
	5	-2	2	8	-4	-9	3	2	3	4	4	4	2	-2	2	2	-2	-1	5	5
4	1	10	10	2	-2	-15	2	4	2	5	5	5	5	5	5	5	2	-3	1	-2
	2	-2	8	4	-8	-9	3	5	3	4	2	2	5	5	4	5	2	-5	5	-1
	3	-4	-2	6	-4	-12	-1	-1	1	-1	1	1	1	2	1	5	3	-4	4	-1
	4	-6	-4	10	-10	-3	4	2	4	5	4	4	2	4	2	5	5	-2	3	5
	5	-8	-6	8	-6	-6	5	3	5	5	3	3	3	3	3	5	4	-1	2	5
5	1	10	10	2	-2	-15	3	5	3	5	5	5	5	4	5	2	-2	-5	1	-3
	2	6	8	4	-8	-12	2	2	2	-1	2	2	5	5	4	3	-1	-4	4	-2
	3	8	6	8	-6	-9	-1	1	1	-2	-1	1	1	-2	1	5	-3	-1	3	-1
	4	-4	-2	10	-10	-3	5	3	5	4	4	4	3	3	3	4	-4	-3	5	-1
	5	-2	4	6	-4	-6	4	4	4	3	3	3	2	-1	2	-1	-5	-2	2	-1
Target Score
	Case1	Case2	Case3	Case4	Case5	Median	Mean
FS1	28	28	20	20	20	20	23.2
FS2	12	-10	-6	2	10	2	1.6
FS3	36	0	16	-4	16	16	12.8
FS4	14	18	2	-10	-6	2	3.6
FS5	2	-8	4	-12	4	2	-2
OAR Score
	Case1	Case2	Case3	Case4	Case5	Median	Mean
FS1	25	24	21	26	18	24	22.8
FS2	4	26	23	30	11	23	18.8
FS3	21	15	-13	-1	-7	-1	3
FS4	42	37	21	44	32	37	35.2
FS5	38	43	22	42	11	38	31.2
Cumulative Score
	Case1	Case2	Case3	Case4	Case5	Median	Mean
FS1	53	52	41	46	38	46	46
FS2	16	16	17	32	21	17	20.4
FS3	57	15	3	-5	9	9	15.8
FS4	56	55	23	34	26	34	38.8
FS5	40	35	26	30	15	30	29.2
